# Supplementary material for: Managed aquifer recharge with reverse-osmosis desalinated seawater: modeling the spreading in groundwater using stable water isotopes
Source: Copernicus journal article supplement (doi:10.5194/hess-22-6323-2018), 2018-12-06
Supplement: Supplementary file 1 [file hess-22-6323-2018-supplement.pdf]

Supplement of Hydrol. Earth Syst. Sci., 22, 6323–6333, 2018  
<https://doi.org/10.5194/hess-22-6323-2018-supplement>  
© Author(s) 2018. This work is distributed under  
the Creative Commons Attribution 4.0 License.

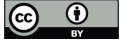

*Supplement of*

## **Managed aquifer recharge with reverse-osmosis desalinated seawater: modeling the spreading in groundwater using stable water isotopes**

**Yonatan Ganot et al.**

*Correspondence to:* Yonatan Ganot ([yonatan.ganot@mail.huji.ac.il](mailto:yonatan.ganot@mail.huji.ac.il))

The copyright of individual parts of the supplement might differ from the CC BY 4.0 License.

**Table S1. Stable water isotopes data**

| Sample location | Type            | Date        | $\delta^{18}\text{O}$ ‰ | $\delta^2\text{H}$ ‰ |
|-----------------|-----------------|-------------|-------------------------|----------------------|
| M2              | Production well | 19 Aug 2015 | -4.78                   | -19.08               |
|                 |                 | 20 Jul 2016 | -4.27                   | -16.67               |
|                 |                 | 13 Mar 2017 | -4.03                   | -16.11               |
|                 |                 | 18 Oct 2017 | -3.37                   | -12.77               |
| M3              |                 | 13 Mar 2017 | -4.87                   | -20.37               |
|                 |                 | 18 Oct 2017 | -5.09                   | -21.35               |
| M4              |                 | 21 May 2015 | -4.82                   | -20.18               |
|                 |                 | 19 Aug 2015 | -5.09                   | -20.88               |
|                 |                 | 20 Jul 2016 | -5.05                   | -20.96               |
|                 |                 | 13 Mar 2017 | -4.60                   | -19.26               |
|                 |                 | 18 Oct 2017 | -4.74                   | -20.05               |
| M6              |                 | 2 Feb 2015  | -4.54                   | -18.89               |
|                 |                 | 21 May 2015 | -4.45                   | -18.34               |
|                 |                 | 19 Aug 2015 | -4.62                   | -18.35               |
|                 |                 | 20 Jul 2016 | -4.43                   | -17.37               |
|                 |                 | 13 Mar 2017 | -3.93                   | -15.40               |
|                 |                 | 18 Oct 2017 | -3.99                   | -15.70               |
| M7              |                 | 21 May 2015 | -4.78                   | -19.99               |
|                 |                 | 19 Aug 2015 | -4.88                   | -19.75               |
| M8              |                 | 13 Mar 2017 | -4.93                   | -20.86               |
|                 |                 | 18 Oct 2017 | -5.02                   | -21.12               |
| M9              |                 | 21 May 2015 | -4.60                   | -18.73               |
|                 |                 | 19 Aug 2015 | -4.61                   | -18.63               |
|                 |                 | 20 Jul 2016 | -4.66                   | -18.54               |
|                 |                 | 13 Mar 2017 | -3.99                   | -15.64               |
|                 |                 | 18 Oct 2017 | -3.90                   | -15.43               |
| M10             |                 | 13 Mar 2017 | -5.00                   | -21.33               |
| M21             |                 | 2 Feb 2015  | -4.95                   | -21.25               |
|                 |                 | 21 May 2015 | -4.94                   | -21.02               |
|                 |                 | 19 Aug 2015 | -5.21                   | -21.95               |
|                 |                 | 18 Oct 2017 | -4.69                   | -19.56               |
| M23             |                 | 21 May 2015 | -5.11                   | -21.62               |
|                 |                 | 19 Aug 2015 | -5.43                   | -22.63               |
|                 |                 | 20 Jul 2016 | -5.41                   | -22.68               |

Table continues one next page

|                       |                  |             |       |        |
|-----------------------|------------------|-------------|-------|--------|
| M26                   | Production well  | 2 Feb 2015  | -5.18 | -22.26 |
|                       |                  | 19 Aug 2015 | -5.02 | -20.71 |
|                       |                  | 20 Jul 2016 | -4.55 | -18.51 |
|                       |                  | 13 Mar 2017 | -4.68 | -19.86 |
|                       |                  | 18 Oct 2017 | -4.88 | -20.49 |
| M27                   |                  | 2 Feb 2015  | -5.10 | -21.97 |
|                       |                  | 13 Mar 2017 | -5.21 | -22.46 |
|                       |                  | 18 Oct 2017 | -5.19 | -22.38 |
| OA                    | Observation well | 1 Feb 2015  | +1.54 | +10.86 |
|                       |                  | 17 May 2015 | +1.31 | +11.18 |
|                       |                  | 19 Aug 2015 | +1.10 | +10.39 |
|                       |                  | 5 Oct 2016  | +0.97 | +9.67  |
|                       |                  | 13 Mar 2017 | +0.96 | +9.61  |
|                       |                  | 18 Oct 2017 | +0.59 | +7.45  |
| OB                    |                  | 1 Feb 2015  | +1.28 | +10.72 |
|                       |                  | 17 May 2015 | +1.33 | +11.34 |
|                       |                  | 19 Aug 2015 | +1.13 | +10.46 |
|                       |                  | 3 Jan 2016  | +1.11 | +10.22 |
|                       |                  | 14 Feb 2016 | +1.19 | +10.60 |
| MAR inlet pipe        | DSW              | 1 Jun 2014  | +1.41 | +11.34 |
|                       |                  | 17 May 2015 | +1.34 | +11.11 |
|                       |                  | 14 Feb 2016 | +1.19 | +10.37 |
| MAR Pond <sup>a</sup> | DSW              | 21 Jan 2015 | +1.59 | +11.51 |
|                       |                  | 21 Jan 2015 | +1.31 | +10.98 |
|                       |                  | 21 Jan 2015 | +1.32 | +11.12 |
|                       |                  | 21 Jan 2015 | +1.34 | +11.01 |
| MAR Runoff canal      | Runoff           | 12 Jan 2017 | -4.77 | -19.50 |

<sup>a</sup>Samples were taken from the south, centre, north and the shore of the DSW MAR pond.
